# Supplementary material
Source: PubMed Central journal article supplement (PMC6324295)
Supplement: jamanetwopen-1-e180826-s001.pdf [file jamanetwopen-1-e180826-s001.pdf]

## Supplementary Online Content

Desai RJ, Mahesri M, Abdia Y, et al. Association of osteoporosis medication use after hip fracture with prevention of subsequent nonvertebral fractures: an instrumental variable analysis. *JAMA Netw Open*. 2018;1(3):e180826. doi:10.1001/jamanetworkopen.2018.0826

**eFigure 1.** Study Design

**eFigure 2.** Proportion of Patients Receiving Treatment With Osteoporosis Medications by Instrumental Variable Strata

**eFigure 3.** Cumulative Regression Function With Pointwise 95% Confidence Interval for the Treatment Effect Under the Additive Hazard Model

**eTable.** Components of the Composite Outcome

**eAppendix.** Model Equations

This supplementary material has been provided by the authors to give readers additional information about their work.

**eFigure 1. Study Design**

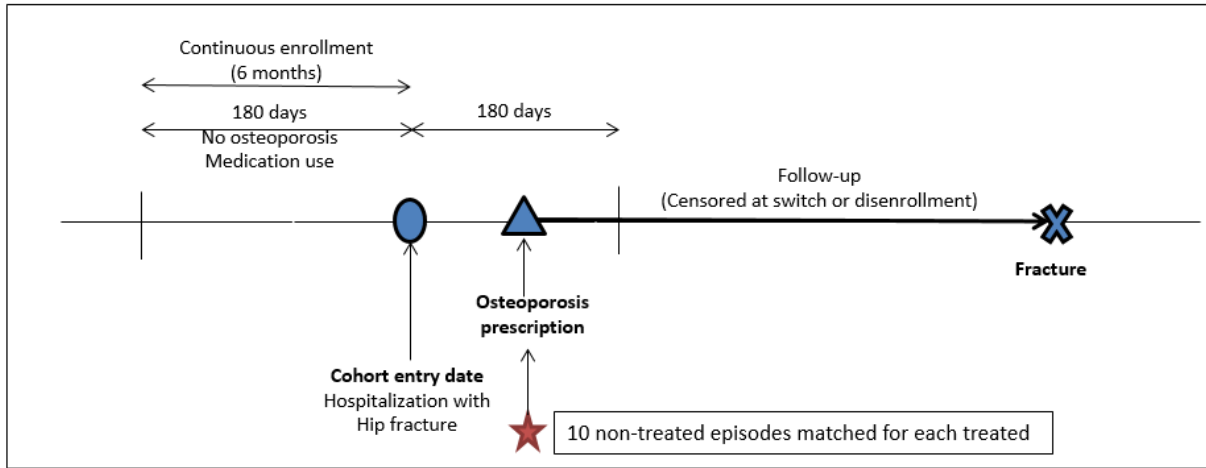

**eFigure 2.** Proportion of Patients Receiving Treatment With Osteoporosis Medications by Instrumental Variable Strata

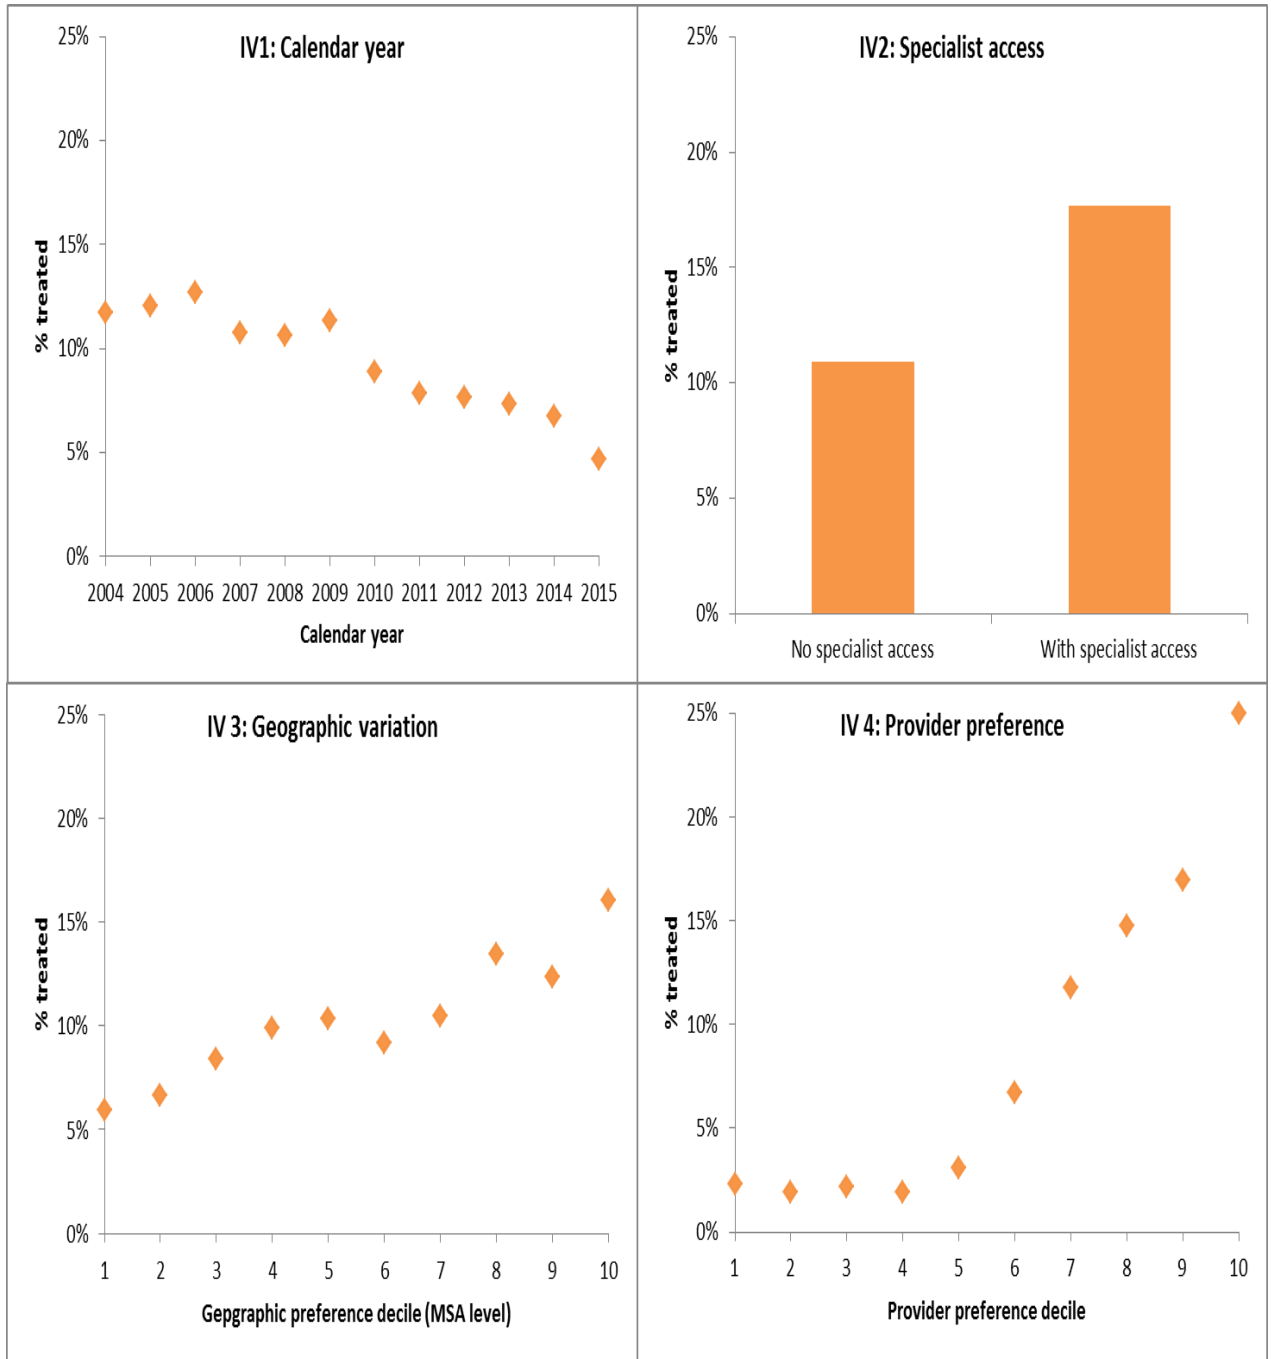

**eFigure 3.** Cumulative Regression Function With Pointwise 95% Confidence Interval for the Treatment Effect Under the Additive Hazard Model

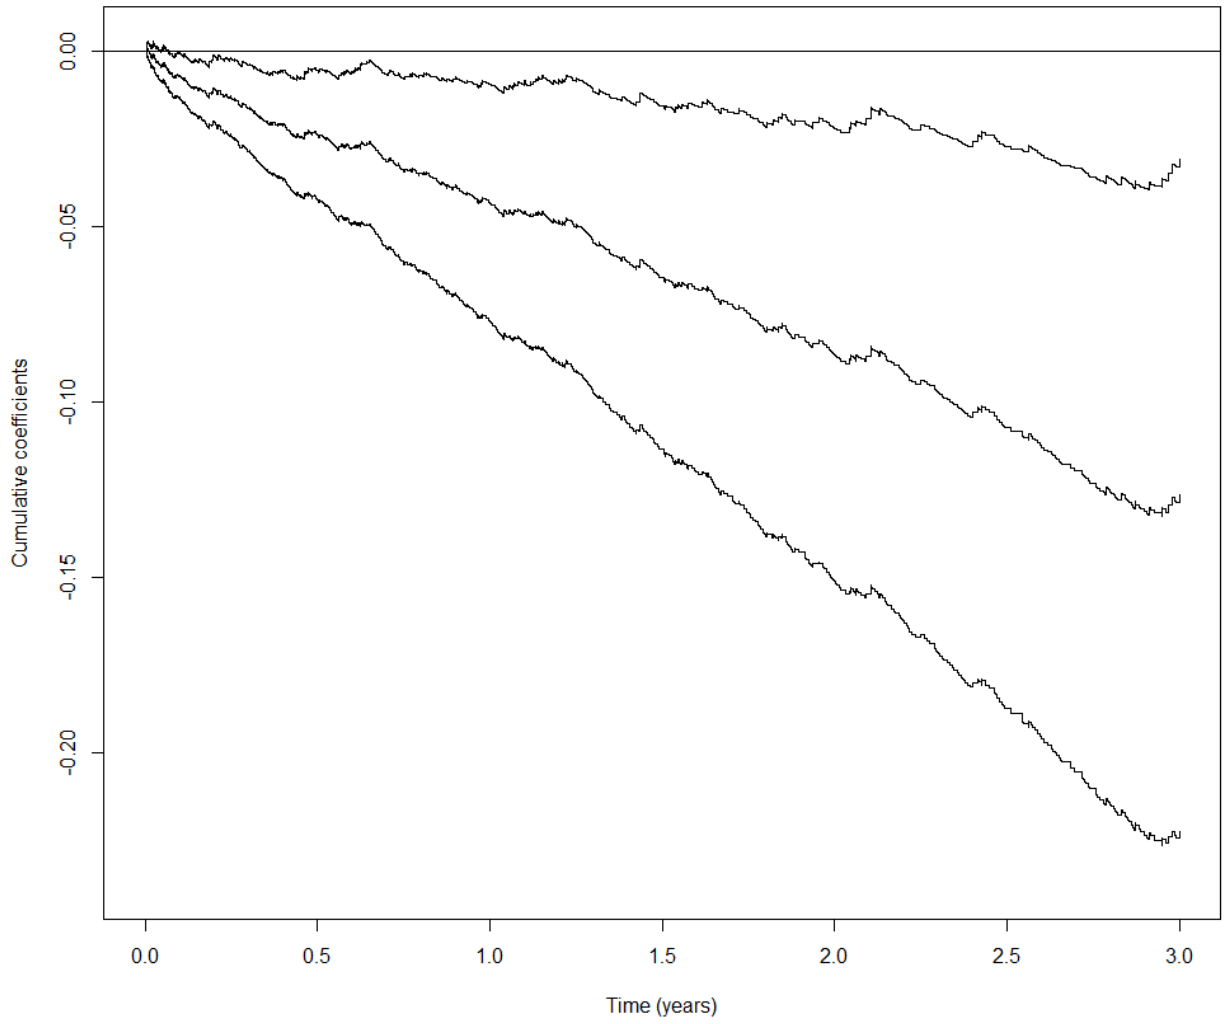

**eTable.** Components of the Composite Outcome

| <b>Fracture</b>       | <b>Definition/codes</b>                                                                                                                                                                                                                                                                                                                                                              |
|-----------------------|--------------------------------------------------------------------------------------------------------------------------------------------------------------------------------------------------------------------------------------------------------------------------------------------------------------------------------------------------------------------------------------|
| 1. Humerus            | Humerus fracture diagnosis (ICD-9: 812.xx, 733.11) AND procedure within 30 days of fracture date (ICD-9: 78.52, 79.01, 79.11, 79.21, 79.31, 79.61; CPT-4: 23600, 23605, 23610, 23615, 23620, 23625, 23630, 23665, 23670, 23680, 24500, 24505, 24506, 24510, 24515, 24530, 24531, 24535, 24536, 24538, 24540, 24542, 24545, 24560, 24565, 24570, 24575, 24581, 24583, 24585-8, 24516) |
| 2. Radius and/or Ulna | Radius/ulna fracture diagnosis (ICD-9: 813.xx, 733.12) AND procedure within 30 days of fracture date (ICD-9: 78.53, 79.02, 79.12, 79.22, 79.32, 79.62; CPT-4: 24620, 24625, 24635, 24650, 24655, 24660, 24665-6, 24670, 24680, 24685, 25500, 25505, 25510, 25515, 25530, 25535, 25540, 25545, 25560, 25565, 25570, 25575, 25600, 25605, 25610-1, 25615, 25620, 25650)                |
| 3. Hip                | Hip fracture diagnosis (ICD-9 code: 820.xx, 733.14) during hospitalization AND procedure code during hospitalization (ICD-9: 78.55, 79.05, 79.15, 79.25, 79.35, 79.65; CPT-4: 27230-27248)                                                                                                                                                                                           |
| 4. Pelvis             | Pelvis fracture diagnosis (ICD-9: 808.xx)                                                                                                                                                                                                                                                                                                                                            |

Codes used for identification of confounding variables: Osteoporosis diagnosis (ICD-9-CM codes 733.0x), presence of bone mineral density test (CPT code 77080, 77085), Parkinson's disease (ICD-9-CM codes 332.xx or 333.0x), Alzheimer's disease or other dementia (ICD-9-CM codes 290.xx, 294.xx, 330.xx, 331.xx), obesity (ICD-9-CM codes 278.0x, 649.1x, V85.3x, V85.4x), diabetes mellitus (ICD-9-CM codes 250.xx), rheumatoid arthritis (ICD-9 codes 714.x), or history of falls, syncope, or gait abnormality (ICD-9-CM codes E885, E885.9x, E888.xx, 780.2x, 458.0x, 781.2x, 782.3x)

## eAppendix. Model Equations

### 1. Mixed effect models for calculating adjusted rates of treatment for creating geographic and provider preference IVs

$$\text{logit} \left( P(Y_{ij} = 1 | \text{Age}_i, \text{Gender}_i, \text{Random effect}_j^*) \right) = \beta_0 + \beta_1 \text{Age}_i + \beta_2 \text{Gender}_i + \beta_{3j}$$

\* MSA Region was the random variable for IV3 and Primary provider was the random variable for IV4

$Y_{ij}$  = treatment initiation status in individual  $i$  in region  $j$  (or with provider  $j$ )

$\beta_0$  = Fixed intercept

$\beta_1$  = Age coefficient

$\beta_2$  = Gender coefficient

$\beta_{3j}$  = Random intercept specific to region  $j$  (or provider  $j$ )

### 2. First stage instrumental variable models

$$\Pr(A_i = 1 | IV = IV_i, X = x_i) = \frac{\exp(\beta_0 + \beta_1 IV_i + \sum_{k=2}^n \beta_k x_{k,i})}{\{1 + \exp(\beta_0 + \beta_1 IV_i + \sum_{k=2}^n \beta_k x_{k,i})\}}$$

$$\Pr(A_i = 1|IV = IV_i, X = x_i)$$

= Probability of osteoporosis medication initiation given covariates and instrumental variable values for each individual  $i$

$\beta_0 =$  Intercept

$\beta_1 =$  IV co-efficient

$\beta_k =$  Co-efficient ( $\beta_2$  through  $\beta_n$ ) for predictor variables

$x_{k,i} =$  Covariate values for individual  $i$

### 3. Second stage instrumental variable model (Additive hazards model)

$$h(t|A, X) = h_0(t) + \beta_1(t)A + \beta_2(t)\Delta + \sum_{k=3}^n \beta_k(t)x_k$$

$h_0(t) =$  baseline hazard

$\beta_1 =$  Treatment effect estimate

$A =$  Actually received treatment

$\beta_2(t)\Delta$

= Control function which is meant to capture variation in the hazard function due to unobserved correlates of the treatment;

where  $\Delta = A - \Pr(A_i = 1|IV = IV_i, X = x_i)$

$\beta_k =$  Co-efficient for other covariates in the model
